# Supplementary material
Source: publisher figshare collection journal article supplement (https://geolsoc.figshare.com/articles/dataset/_/3453044)
Supplement: Supplementary file 1 [file 1]

Appendix 2. LA-ICP-MS zircon U-Pb data of the andesite, gabbroic diorite, and potassic-altered diorite from the Gangcha complex in the Xiekeng Cu-Au deposit.

| Spots            | Pb    | Th  | U   | Th/U | Isotopic ratios                   |            |                                  |            | Age (Ma)                         |            |                                   |            | Concordance                      |            |                                  |            |    |
|------------------|-------|-----|-----|------|-----------------------------------|------------|----------------------------------|------------|----------------------------------|------------|-----------------------------------|------------|----------------------------------|------------|----------------------------------|------------|----|
|                  |       |     |     |      | $^{207}\text{Pb}/\text{Pb}^{206}$ | 1 $\sigma$ | $^{207}\text{Pb}/\text{U}^{235}$ | 1 $\sigma$ | $^{206}\text{Pb}/\text{U}^{238}$ | 1 $\sigma$ | $^{207}\text{Pb}/\text{Pb}^{206}$ | 1 $\sigma$ | $^{207}\text{Pb}/\text{U}^{235}$ | 1 $\sigma$ | $^{206}\text{Pb}/\text{U}^{238}$ | 1 $\sigma$ | %  |
| 09XK30: andesite |       |     |     |      |                                   |            |                                  |            |                                  |            |                                   |            |                                  |            |                                  |            |    |
| 1                | 8.57  | 116 | 202 | 0.57 | 0.05154                           | 0.00033    | 0.27142                          | 0.00337    | 0.03824                          | 0.00029    | 265                               | 14         | 244                              | 3          | 242                              | 2          | 98 |
| 2                | 8.90  | 90  | 204 | 0.44 | 0.05663                           | 0.00052    | 0.38586                          | 0.00723    | 0.04931                          | 0.00062    | 477                               | 19         | 331                              | 5          | 310                              | 4          | 92 |
| 3                | 18.76 | 147 | 503 | 0.29 | 0.05244                           | 0.00033    | 0.28123                          | 0.00397    | 0.03912                          | 0.00045    | 305                               | 13         | 252                              | 3          | 247                              | 3          | 99 |
| 4                | 10.64 | 142 | 188 | 0.75 | 0.05173                           | 0.00041    | 0.27022                          | 0.00377    | 0.03793                          | 0.00028    | 274                               | 17         | 243                              | 3          | 240                              | 2          | 98 |
| 5                | 9.21  | 179 | 216 | 0.83 | 0.05189                           | 0.0004     | 0.26576                          | 0.00362    | 0.03714                          | 0.00027    | 280                               | 17         | 239                              | 3          | 235                              | 2          | 99 |
| 6                | 12.85 | 135 | 319 | 0.42 | 0.05207                           | 0.00031    | 0.2755                           | 0.00318    | 0.03837                          | 0.00027    | 289                               | 13         | 247                              | 3          | 243                              | 2          | 97 |
| 7                | 8.60  | 131 | 198 | 0.66 | 0.05026                           | 0.00031    | 0.26615                          | 0.0033     | 0.03846                          | 0.00031    | 207                               | 13         | 240                              | 3          | 243                              | 2          | 99 |
| 8                | 4.75  | 63  | 91  | 0.69 | 0.05136                           | 0.0006     | 0.27452                          | 0.00532    | 0.03885                          | 0.00037    | 257                               | 25         | 246                              | 4          | 246                              | 2          | 97 |
| 9                | 4.23  | 54  | 107 | 0.50 | 0.05183                           | 0.0006     | 0.27785                          | 0.00547    | 0.03883                          | 0.00039    | 278                               | 25         | 249                              | 4          | 246                              | 2          | 98 |
| 10               | 7.87  | 58  | 94  | 0.62 | 0.05698                           | 0.00041    | 0.56896                          | 0.00791    | 0.0724                           | 0.00062    | 491                               | 15         | 457                              | 5          | 451                              | 4          | 98 |
| 11               | 8.84  | 123 | 175 | 0.70 | 0.05137                           | 0.00042    | 0.27477                          | 0.00434    | 0.03884                          | 0.00037    | 257                               | 18         | 247                              | 3          | 246                              | 2          | 99 |
| 12               | 7.38  | 141 | 216 | 0.65 | 0.05132                           | 0.00035    | 0.27112                          | 0.00382    | 0.03838                          | 0.00037    | 255                               | 15         | 244                              | 3          | 243                              | 2          | 98 |
| 13               | 5.78  | 73  | 167 | 0.44 | 0.05215                           | 0.00035    | 0.27499                          | 0.00357    | 0.03828                          | 0.0003     | 292                               | 14         | 247                              | 3          | 242                              | 2          | 98 |
| 14               | 14.53 | 282 | 313 | 0.90 | 0.05074                           | 0.00035    | 0.26559                          | 0.00382    | 0.038                            | 0.00038    | 229                               | 15         | 239                              | 3          | 240                              | 2          | 99 |
| 15               | 4.11  | 68  | 139 | 0.49 | 0.05035                           | 0.00044    | 0.26212                          | 0.00411    | 0.03785                          | 0.00033    | 211                               | 19         | 236                              | 3          | 239                              | 2          | 99 |
| 16               | 14.16 | 177 | 382 | 0.46 | 0.0518                            | 0.00021    | 0.27239                          | 0.00233    | 0.03817                          | 0.00024    | 276                               | 9          | 245                              | 2          | 241                              | 1          | 98 |
| 17               | 12.05 | 192 | 278 | 0.69 | 0.05115                           | 0.00029    | 0.26849                          | 0.0029     | 0.0381                           | 0.00025    | 248                               | 12         | 241                              | 2          | 241                              | 2          | 99 |
| 18               | 8.63  | 133 | 255 | 0.52 | 0.05112                           | 0.00032    | 0.27359                          | 0.0038     | 0.03886                          | 0.00042    | 246                               | 13         | 246                              | 3          | 246                              | 3          | 99 |
| 19               | 10.64 | 164 | 299 | 0.55 | 0.05179                           | 0.00032    | 0.2749                           | 0.00364    | 0.03846                          | 0.00037    | 276                               | 13         | 247                              | 3          | 243                              | 2          | 97 |
| 20               | 5.36  | 68  | 149 | 0.46 | 0.05147                           | 0.00044    | 0.27054                          | 0.00412    | 0.03815                          | 0.00032    | 262                               | 18         | 243                              | 3          | 241                              | 2          | 98 |
| 21               | 6.45  | 98  | 177 | 0.55 | 0.05092                           | 0.00035    | 0.27024                          | 0.00379    | 0.03859                          | 0.00036    | 237                               | 15         | 243                              | 3          | 244                              | 2          | 99 |
| 22               | 11.36 | 201 | 387 | 0.52 | 0.05216                           | 0.00023    | 0.27209                          | 0.00247    | 0.03786                          | 0.00024    | 292                               | 9          | 244                              | 2          | 240                              | 2          | 98 |
| 23               | 10.93 | 84  | 106 | 0.79 | 0.05687                           | 0.00034    | 0.57442                          | 0.00679    | 0.07327                          | 0.00057    | 487                               | 12         | 461                              | 4          | 456                              | 3          | 98 |
| 24               | 3.93  | 43  | 45  | 0.96 | 0.05578                           | 0.00057    | 0.55379                          | 0.01021    | 0.07231                          | 0.00074    | 444                               | 21         | 447                              | 7          | 450                              | 4          | 99 |
| 25               | 17.50 | 91  | 55  | 1.65 | 0.06567                           | 0.00039    | 1.15941                          | 0.01478    | 0.12808                          | 0.00119    | 796                               | 12         | 782                              | 7          | 777                              | 7          | 99 |
| 26               | 8.60  | 127 | 160 | 0.79 | 0.05163                           | 0.00037    | 0.27629                          | 0.00379    | 0.03887                          | 0.00032    | 269                               | 15         | 248                              | 3          | 246                              | 2          | 98 |

|                          |        |      |      |      |         |         |         |         |         |         |     |    |     |   |     |   |    |
|--------------------------|--------|------|------|------|---------|---------|---------|---------|---------|---------|-----|----|-----|---|-----|---|----|
| 27                       | 7.01   | 110  | 133  | 0.83 | 0.05225 | 0.00037 | 0.27803 | 0.0039  | 0.03866 | 0.00035 | 296 | 15 | 249 | 3 | 245 | 2 | 97 |
| 28                       | 8.14   | 102  | 151  | 0.67 | 0.05255 | 0.00048 | 0.27074 | 0.00408 | 0.03735 | 0.00027 | 310 | 19 | 243 | 3 | 236 | 2 | 96 |
| 29                       | 16.46  | 167  | 426  | 0.39 | 0.05095 | 0.00026 | 0.27119 | 0.00292 | 0.03862 | 0.0003  | 238 | 11 | 244 | 2 | 244 | 2 | 98 |
| 30                       | 7.54   | 107  | 121  | 0.88 | 0.04993 | 0.00049 | 0.26368 | 0.00422 | 0.0384  | 0.00029 | 192 | 21 | 238 | 3 | 243 | 2 | 98 |
| 31                       | 9.00   | 32   | 60   | 0.53 | 0.05788 | 0.00048 | 0.57715 | 0.00919 | 0.07239 | 0.00072 | 525 | 17 | 463 | 6 | 451 | 4 | 96 |
| 09XK47: gabbroic diorite |        |      |      |      |         |         |         |         |         |         |     |    |     |   |     |   |    |
| 1                        | 50.93  | 813  | 736  | 1.10 | 0.05169 | 0.00016 | 0.2797  | 0.00202 | 0.03924 | 0.00025 | 272 | 7  | 250 | 2 | 248 | 2 | 98 |
| 2                        | 45.92  | 808  | 647  | 1.25 | 0.0514  | 0.00016 | 0.27443 | 0.00198 | 0.03874 | 0.00026 | 259 | 7  | 246 | 2 | 245 | 2 | 99 |
| 3                        | 32.41  | 535  | 493  | 1.08 | 0.05106 | 0.00018 | 0.27082 | 0.00209 | 0.03846 | 0.00022 | 243 | 8  | 243 | 2 | 243 | 1 | 99 |
| 4                        | 134.80 | 2305 | 1833 | 1.26 | 0.05151 | 0.00014 | 0.27635 | 0.00169 | 0.03891 | 0.00021 | 264 | 6  | 248 | 1 | 246 | 1 | 99 |
| 5                        | 18.91  | 299  | 296  | 1.01 | 0.05125 | 0.00019 | 0.27271 | 0.00232 | 0.03864 | 0.00029 | 252 | 8  | 245 | 2 | 244 | 2 | 99 |
| 6                        | 52.27  | 855  | 820  | 1.04 | 0.0512  | 0.00016 | 0.27402 | 0.00195 | 0.03881 | 0.00024 | 250 | 7  | 246 | 2 | 245 | 1 | 99 |
| 7                        | 19.90  | 328  | 345  | 0.95 | 0.05144 | 0.00018 | 0.27804 | 0.00227 | 0.03922 | 0.00027 | 261 | 8  | 249 | 2 | 248 | 2 | 99 |
| 8                        | 57.04  | 983  | 810  | 1.21 | 0.05117 | 0.00017 | 0.27542 | 0.00208 | 0.03902 | 0.00025 | 249 | 7  | 247 | 2 | 247 | 2 | 99 |
| 9                        | 9.22   | 135  | 159  | 0.85 | 0.05113 | 0.00027 | 0.27199 | 0.003   | 0.03859 | 0.00029 | 246 | 12 | 244 | 2 | 244 | 2 | 99 |
| 10                       | 34.24  | 562  | 590  | 0.95 | 0.05106 | 0.0002  | 0.27061 | 0.00245 | 0.03843 | 0.0003  | 244 | 9  | 243 | 2 | 243 | 2 | 99 |
| 11                       | 26.67  | 448  | 452  | 0.99 | 0.05134 | 0.00019 | 0.27398 | 0.00223 | 0.03871 | 0.00025 | 256 | 8  | 246 | 2 | 245 | 2 | 99 |
| 12                       | 15.86  | 251  | 267  | 0.94 | 0.05124 | 0.00023 | 0.27118 | 0.00255 | 0.03841 | 0.00026 | 252 | 10 | 244 | 2 | 243 | 2 | 99 |
| 13                       | 7.04   | 124  | 144  | 0.86 | 0.05224 | 0.00032 | 0.27761 | 0.00325 | 0.03858 | 0.00028 | 296 | 13 | 249 | 3 | 244 | 2 | 98 |
| 14                       | 8.10   | 118  | 180  | 0.66 | 0.05078 | 0.00025 | 0.26997 | 0.0028  | 0.03861 | 0.0003  | 231 | 11 | 243 | 2 | 244 | 2 | 99 |
| 15                       | 235.21 | 4799 | 2072 | 2.32 | 0.05113 | 0.00017 | 0.27527 | 0.00204 | 0.03905 | 0.00027 | 247 | 7  | 247 | 2 | 247 | 2 | 99 |
| 16                       | 24.78  | 353  | 372  | 0.95 | 0.05132 | 0.00024 | 0.27478 | 0.00234 | 0.03882 | 0.00019 | 255 | 10 | 247 | 2 | 246 | 1 | 99 |
| 17                       | 77.55  | 1383 | 1125 | 1.23 | 0.05147 | 0.00021 | 0.27369 | 0.00259 | 0.0386  | 0.00035 | 262 | 9  | 246 | 2 | 244 | 2 | 99 |
| 18                       | 6.72   | 149  | 151  | 0.99 | 0.0526  | 0.0006  | 0.27546 | 0.00555 | 0.03799 | 0.00041 | 312 | 25 | 247 | 4 | 240 | 3 | 97 |
| 19                       | 17.53  | 272  | 269  | 1.01 | 0.05238 | 0.00041 | 0.27603 | 0.00417 | 0.03822 | 0.00036 | 302 | 17 | 247 | 3 | 242 | 2 | 98 |
| 20                       | 10.85  | 176  | 179  | 0.98 | 0.0501  | 0.00031 | 0.26748 | 0.00292 | 0.03873 | 0.00022 | 200 | 14 | 241 | 2 | 245 | 1 | 97 |
| 21                       | 18.52  | 335  | 335  | 1.00 | 0.05163 | 0.00026 | 0.26616 | 0.00259 | 0.03739 | 0.00022 | 269 | 11 | 240 | 2 | 237 | 1 | 99 |
| 22                       | 19.94  | 358  | 323  | 1.11 | 0.05167 | 0.00032 | 0.27373 | 0.00324 | 0.03842 | 0.00028 | 271 | 14 | 246 | 3 | 243 | 2 | 99 |
| 23                       | 13.47  | 230  | 237  | 0.97 | 0.05105 | 0.00038 | 0.26959 | 0.00321 | 0.03828 | 0.00021 | 243 | 16 | 242 | 3 | 242 | 1 | 99 |
| 24                       | 58.14  | 1143 | 825  | 1.38 | 0.05159 | 0.00016 | 0.27108 | 0.00189 | 0.03811 | 0.00023 | 267 | 7  | 244 | 2 | 241 | 1 | 99 |

|                                   |        |      |      |      |         |         |         |         |         |         |     |    |     |   |     |   |    |
|-----------------------------------|--------|------|------|------|---------|---------|---------|---------|---------|---------|-----|----|-----|---|-----|---|----|
| 25                                | 12.36  | 215  | 224  | 0.96 | 0.05183 | 0.00026 | 0.27526 | 0.00284 | 0.03855 | 0.00027 | 278 | 11 | 247 | 2 | 244 | 2 | 98 |
| 26                                | 48.05  | 945  | 788  | 1.20 | 0.05078 | 0.00016 | 0.26969 | 0.00191 | 0.03852 | 0.00022 | 231 | 7  | 242 | 2 | 244 | 1 | 99 |
| 27                                | 137.02 | 2748 | 1857 | 1.48 | 0.05127 | 0.00016 | 0.27482 | 0.00193 | 0.03887 | 0.00026 | 253 | 7  | 247 | 2 | 246 | 2 | 99 |
| 28                                | 33.25  | 633  | 575  | 1.10 | 0.05133 | 0.00018 | 0.2755  | 0.00216 | 0.03893 | 0.00025 | 256 | 8  | 247 | 2 | 246 | 2 | 99 |
| 29                                | 11.22  | 190  | 208  | 0.91 | 0.05036 | 0.00025 | 0.26838 | 0.00283 | 0.03866 | 0.00029 | 211 | 11 | 241 | 2 | 245 | 2 | 99 |
| 10XKTK3: potassic-altered diorite |        |      |      |      |         |         |         |         |         |         |     |    |     |   |     |   |    |
| 1                                 | 4.46   | 68   | 89   | 0.76 | 0.05055 | 0.00037 | 0.25484 | 0.00341 | 0.03665 | 0.00028 | 220 | 16 | 231 | 3 | 232 | 2 | 99 |
| 2                                 | 26.94  | 413  | 600  | 0.69 | 0.05041 | 0.0002  | 0.25791 | 0.00225 | 0.03711 | 0.00026 | 214 | 9  | 233 | 2 | 235 | 2 | 99 |
| 3                                 | 31.08  | 582  | 534  | 1.09 | 0.05055 | 0.00014 | 0.25661 | 0.00161 | 0.03683 | 0.00018 | 221 | 6  | 232 | 1 | 233 | 1 | 98 |
| 4                                 | 6.12   | 81   | 220  | 0.37 | 0.04998 | 0.00019 | 0.25412 | 0.00199 | 0.03691 | 0.00021 | 194 | 8  | 230 | 2 | 234 | 1 | 99 |
| 5                                 | 8.33   | 124  | 281  | 0.44 | 0.05042 | 0.00021 | 0.2573  | 0.00219 | 0.03705 | 0.00021 | 214 | 9  | 232 | 2 | 235 | 1 | 97 |
| 6                                 | 4.85   | 71   | 158  | 0.45 | 0.04933 | 0.00025 | 0.24912 | 0.00242 | 0.03671 | 0.00022 | 164 | 11 | 226 | 2 | 232 | 1 | 98 |
| 7                                 | 26.63  | 256  | 274  | 0.93 | 0.05427 | 0.00017 | 0.50318 | 0.00371 | 0.06732 | 0.00045 | 382 | 7  | 414 | 3 | 420 | 3 | 99 |
| 8                                 | 17.51  | 262  | 434  | 0.60 | 0.05059 | 0.00023 | 0.25768 | 0.00234 | 0.03692 | 0.00022 | 222 | 10 | 233 | 2 | 234 | 1 | 99 |
| 9                                 | 5.16   | 55   | 77   | 0.71 | 0.05078 | 0.00119 | 0.26347 | 0.00859 | 0.03728 | 0.0004  | 231 | 52 | 237 | 7 | 236 | 2 | 99 |
| 10                                | 17.77  | 67   | 491  | 0.14 | 0.05524 | 0.00017 | 0.51125 | 0.00355 | 0.0671  | 0.00038 | 422 | 7  | 419 | 2 | 419 | 2 | 96 |
| 11                                | 2.74   | 32   | 128  | 0.25 | 0.04892 | 0.00029 | 0.24996 | 0.0028  | 0.03705 | 0.00025 | 144 | 13 | 227 | 2 | 235 | 2 | 97 |
| 12                                | 9.66   | 141  | 221  | 0.64 | 0.0493  | 0.00021 | 0.25229 | 0.00223 | 0.03711 | 0.00022 | 162 | 10 | 228 | 2 | 235 | 1 | 97 |
| 13                                | 3.26   | 46   | 97   | 0.47 | 0.04925 | 0.00028 | 0.24994 | 0.00278 | 0.03685 | 0.00026 | 160 | 13 | 227 | 2 | 233 | 2 | 98 |
| 14                                | 5.53   | 73   | 95   | 0.77 | 0.05    | 0.00038 | 0.25436 | 0.00345 | 0.037   | 0.00027 | 195 | 17 | 230 | 3 | 234 | 2 | 96 |
| 15                                | 9.49   | 144  | 307  | 0.47 | 0.04906 | 0.00022 | 0.24975 | 0.00252 | 0.03693 | 0.0003  | 151 | 10 | 226 | 2 | 234 | 2 | 97 |
| 16                                | 2.97   | 78   | 106  | 0.74 | 0.04946 | 0.00031 | 0.25312 | 0.00317 | 0.03719 | 0.00031 | 170 | 14 | 229 | 3 | 235 | 2 | 98 |
| 17                                | 9.68   | 161  | 288  | 0.56 | 0.04983 | 0.0002  | 0.25663 | 0.00234 | 0.03738 | 0.00029 | 187 | 9  | 232 | 2 | 237 | 2 | 98 |
| 18                                | 10.25  | 165  | 254  | 0.65 | 0.05191 | 0.0002  | 0.26186 | 0.00223 | 0.03662 | 0.00024 | 282 | 8  | 236 | 2 | 232 | 2 | 98 |
| 19                                | 5.51   | 46   | 79   | 0.58 | 0.04992 | 0.00031 | 0.25173 | 0.00296 | 0.03664 | 0.00026 | 191 | 14 | 228 | 2 | 232 | 2 | 96 |
| 20                                | 6.92   | 100  | 201  | 0.50 | 0.04914 | 0.0002  | 0.24973 | 0.00219 | 0.03689 | 0.00024 | 155 | 9  | 226 | 2 | 234 | 2 | 95 |
| 21                                | 5.04   | 51   | 77   | 0.66 | 0.04825 | 0.00038 | 0.24735 | 0.00355 | 0.03724 | 0.0003  | 111 | 18 | 224 | 3 | 236 | 2 | 95 |
