# Supplementary material
Source: publisher figshare collection journal article supplement (https://geolsoc.figshare.com/articles/dataset/_/3453044)
Supplement: Supplementary file 2 [file 1]

Appendix 1. Major (wt%) and trace element (ppm) abundances of the igneous rocks samples from the Gangcha complex in the Xiekeng Cu-Au deposit, west Qinling Terrane.

| sample                         | Dacite |       | Andesite |       |       |       | Gabbroic diorite |       |       |       |       |       |       | Gabbro |       |       |       |
|--------------------------------|--------|-------|----------|-------|-------|-------|------------------|-------|-------|-------|-------|-------|-------|--------|-------|-------|-------|
|                                | XK8    | XK20  | XK27     | XK29  | XK31  | XK33  | XK35             | XK7   | XK11  | XK12  | XK15  | XK17  | XK39  | XK40   | XK41  | XK22  | XK23  |
| Major oxides (wt.%)            |        |       |          |       |       |       |                  |       |       |       |       |       |       |        |       |       |       |
| SiO <sub>2</sub>               | 66.73  | 66.97 | 64.08    | 64.32 | 64.01 | 64.06 | 64.22            | 54.68 | 54.99 | 54.92 | 54.1  | 55.1  | 55.33 | 54.69  | 57.71 | 50.71 | 48.77 |
| TiO <sub>2</sub>               | 0.35   | 0.34  | 0.47     | 0.46  | 0.47  | 0.47  | 0.47             | 0.87  | 0.94  | 0.95  | 0.94  | 0.96  | 0.86  | 1.12   | 0.69  | 0.52  | 1.06  |
| Al <sub>2</sub> O <sub>3</sub> | 17.14  | 16.76 | 16.91    | 16.95 | 16.88 | 17.14 | 16.98            | 15.15 | 16.21 | 16.18 | 16.34 | 16.17 | 15.74 | 16.15  | 14.87 | 10.93 | 11.35 |
| Fe <sub>2</sub> O <sub>3</sub> | 0.92   | 0.82  | 0.64     | 0.74  | 0.7   | 0.53  | 0.53             | 1.2   | 1.6   | 1.57  | 1.86  | 1.97  | 1.35  | 1.23   | 1.23  | 2.17  | 3.04  |
| FeO                            | 2.07   | 2.03  | 2.42     | 1.67  | 2.14  | 2.35  | 2.35             | 5.69  | 5.98  | 5.91  | 5.69  | 5.66  | 5.8   | 6.38   | 5.08  | 8.17  | 8.71  |
| MnO                            | 0.05   | 0.05  | 0.04     | 0.04  | 0.04  | 0.02  | 0.04             | 0.13  | 0.14  | 0.13  | 0.13  | 0.14  | 0.13  | 0.12   | 0.11  | 0.19  | 0.18  |
| MgO                            | 1.26   | 1.73  | 2.08     | 1.91  | 1.77  | 2.07  | 2                | 6.79  | 6.85  | 6.73  | 6.65  | 6.78  | 6.31  | 5.71   | 6.04  | 11.3  | 10.84 |
| CaO                            | 4.37   | 4.67  | 3.84     | 3.83  | 4.58  | 4.45  | 3.76             | 9.8   | 8.67  | 8.72  | 8.71  | 8.63  | 8.15  | 7.96   | 8.18  | 11.05 | 11.09 |
| Na <sub>2</sub> O              | 4.11   | 3.51  | 4.76     | 5.37  | 4.96  | 4.59  | 4.58             | 3.05  | 2.97  | 2.98  | 2.98  | 2.96  | 2.88  | 3.59   | 3.02  | 2.12  | 2     |
| K <sub>2</sub> O               | 1.17   | 1.35  | 3.35     | 3.88  | 3.17  | 3.23  | 4.09             | 1.42  | 1.33  | 1.34  | 1.24  | 1.38  | 1.5   | 1.6    | 2.01  | 0.79  | 1.04  |
| P <sub>2</sub> O <sub>5</sub>  | 0.12   | 0.12  | 0.14     | 0.14  | 0.14  | 0.14  | 0.14             | 0.15  | 0.15  | 0.15  | 0.15  | 0.16  | 0.12  | 0.2    | 0.11  | 0.04  | 0.03  |
| LOI                            | 1.45   | 1.51  | 1.22     | 0.6   | 0.58  | 0.92  | 0.86             | 0.71  | -0.07 | -0.01 | 0.85  | -0.03 | 0.77  | 0.44   | 0.51  | 1.43  | 1.68  |
| Total                          | 99.74  | 99.86 | 99.95    | 99.91 | 99.44 | 99.97 | 100.02           | 99.64 | 99.76 | 99.57 | 99.64 | 99.88 | 98.94 | 99.19  | 99.56 | 99.42 | 99.79 |
| <sup>T</sup> FeO               | 2.90   | 2.77  | 3.00     | 2.34  | 2.77  | 2.83  | 2.83             | 6.77  | 7.42  | 7.32  | 7.36  | 7.43  | 7.01  | 7.49   | 6.19  | 10.12 | 11.45 |
| Mg#                            | 43.90  | 52.94 | 55.55    | 59.54 | 53.49 | 56.86 | 56.01            | 64.35 | 62.43 | 62.33 | 61.91 | 62.15 | 61.82 | 57.86  | 63.73 | 66.77 | 63.03 |
| A/CNK                          | 1.07   | 1.06  | 0.92     | 0.85  | 0.85  | 0.89  | 0.9              | 0.62  | 0.73  | 0.73  | 0.74  | 0.73  | 0.74  | 0.73   | 0.67  | 0.45  | 0.46  |
| Trace elements (ppm)           |        |       |          |       |       |       |                  |       |       |       |       |       |       |        |       |       |       |
| Li                             | 64.7   | 71    | 32.2     | 17.4  | 18.6  | 21.9  | 21               | 32.8  | 20.9  | 18.6  | 24.2  | 21    | 40.7  | 45.1   | 31.5  | 23.6  | 29.4  |
| Sc                             | 4.8    | 5.23  | 7.76     | 7.69  | 7.86  | 8.4   | 7.92             | 29.5  | 29    | 26.9  | 27.2  | 28.5  | 25.7  | 24.9   | 28.9  | 46.1  | 42.9  |
| V                              | 33.5   | 32.8  | 53.8     | 50.3  | 55.3  | 53.1  | 51.8             | 184   | 201   | 184   | 187   | 200   | 170   | 168    | 163   | 242   | 397   |
| Cr                             | 10.1   | 13    | 7.52     | 8.24  | 8.61  | 8.79  | 9.32             | 190   | 233   | 212   | 206   | 199   | 186   | 156    | 189   | 545   | 453   |
| Co                             | 8.28   | 4.53  | 6.88     | 7.47  | 7.02  | 7.81  | 12.5             | 31.3  | 32.4  | 29.4  | 31.7  | 30.8  | 28.8  | 31.4   | 24    | 43.6  | 50.2  |
| Ni                             | 5.07   | 5.05  | 3.41     | 4.78  | 4.08  | 3.56  | 4.57             | 47.7  | 59.3  | 54.2  | 57.6  | 56.3  | 56.5  | 44     | 54.1  | 103   | 125   |
| Cu                             | 8      | 6.57  | 8.93     | 7.84  | 9.7   | 7.24  | 7.45             | 59.4  | 45.9  | 92.1  | 172   | 61.2  | 12.5  | 90.1   | 25.8  | 11.9  | 78.3  |
| Ga                             | 16.6   | 16.7  | 17.8     | 17.3  | 17.7  | 17.7  | 17.4             | 16.4  | 17.8  | 16.1  | 17.5  | 17.3  | 16.7  | 18.3   | 16    | 13.2  | 14.9  |

|                      |       |       |        |       |       |        |        |       |      |       |       |       |        |       |      |       |       |
|----------------------|-------|-------|--------|-------|-------|--------|--------|-------|------|-------|-------|-------|--------|-------|------|-------|-------|
| Rb                   | 35.6  | 34.8  | 126    | 154   | 91.6  | 106    | 163    | 44.8  | 45.1 | 42.8  | 40.3  | 44.4  | 52.1   | 69.6  | 54.5 | 32.2  | 40.8  |
| Sr                   | 326   | 347   | 326    | 319   | 337   | 327    | 319    | 280   | 255  | 238   | 251   | 242   | 251    | 276   | 293  | 202   | 206   |
| Y                    | 11.1  | 12.2  | 15.8   | 16    | 16.1  | 15.6   | 16.3   | 21.6  | 23.4 | 21.7  | 21.8  | 23.1  | 24.7   | 24.1  | 27.6 | 22.9  | 22.4  |
| Zr                   | 174   | 172   | 171    | 176   | 177   | 171    | 181    | 145   | 156  | 150   | 151   | 155   | 75.9   | 186   | 372  | 94.7  | 88.4  |
| Nb                   | 7     | 6.85  | 7.66   | 7.78  | 7.88  | 7.56   | 7.85   | 4.63  | 4.57 | 4.35  | 4.36  | 4.48  | 11.9   | 7.09  | 8.72 | 1.68  | 1.83  |
| Cs                   | 4.01  | 5.01  | 3.58   | 2.37  | 4.14  | 4.19   | 3.4    | 5.85  | 3.93 | 3.86  | 3.78  | 3.96  | 7.48   | 10.8  | 4.88 | 7.61  | 8.45  |
| Ba                   | 227   | 352   | 676    | 750   | 712   | 689    | 798    | 302   | 233  | 221   | 235   | 235   | 379    | 275   | 448  | 130   | 154   |
| Hf                   | 4.47  | 4.28  | 4.53   | 4.62  | 4.67  | 4.4    | 4.82   | 3.95  | 4.1  | 4     | 4.11  | 4.08  | 2.55   | 4.92  | 8.73 | 2.7   | 2.52  |
| Ta                   | 0.57  | 0.55  | 0.68   | 0.66  | 0.66  | 0.66   | 0.67   | 0.36  | 0.37 | 0.36  | 0.33  | 0.36  | 0.76   | 0.56  | 0.55 | 0.11  | 0.13  |
| Pb                   | 16.8  | 42.9  | 29.1   | 15.1  | 22.5  | 17.3   | 16.2   | 18.4  | 10.8 | 10.6  | 11.2  | 10.4  | 11.1   | 17.5  | 9.68 | 8.55  | 7.38  |
| Th                   | 4.59  | 5.09  | 9.52   | 9     | 9.8   | 9.52   | 9.45   | 4.11  | 4.35 | 4.22  | 3.55  | 4.44  | 5.69   | 6.43  | 4.77 | 2.59  | 2.4   |
| U                    | 1.38  | 1.37  | 2.28   | 2.39  | 2.49  | 2.44   | 2.81   | 1.1   | 1.19 | 1.17  | 0.96  | 1.25  | 0.99   | 2.24  | 1.52 | 0.73  | 0.63  |
| La                   | 14.5  | 15.6  | 23.6   | 18.9  | 26    | 23     | 22.6   | 13    | 12.7 | 12.4  | 11.9  | 12.5  | 17.7   | 15.8  | 14.7 | 7.82  | 7.59  |
| Ce                   | 26.6  | 28    | 43.4   | 37    | 45.4  | 41.9   | 40.6   | 27.6  | 26.8 | 26    | 25    | 26.2  | 36.4   | 32.2  | 30.7 | 17    | 16.3  |
| Pr                   | 3.45  | 3.6   | 5.12   | 4.59  | 5.29  | 4.94   | 4.95   | 3.76  | 3.68 | 3.56  | 3.5   | 3.5   | 4.76   | 4.27  | 4.26 | 2.48  | 2.44  |
| Nd                   | 12.7  | 13.3  | 17.8   | 16.7  | 18.4  | 17.4   | 17.6   | 15.2  | 15.4 | 14.5  | 14.5  | 14.8  | 19.7   | 17.5  | 17.9 | 11.3  | 11.2  |
| Sm                   | 2.56  | 2.58  | 3.2    | 3.22  | 3.24  | 3.47   | 3.39   | 3.68  | 3.76 | 3.74  | 3.85  | 3.76  | 4.55   | 4.24  | 4.55 | 3.18  | 3.05  |
| Eu                   | 0.74  | 0.78  | 0.83   | 0.82  | 0.88  | 0.88   | 0.88   | 1.04  | 1.06 | 1.03  | 1.05  | 1.02  | 0.93   | 1.15  | 0.91 | 0.94  | 0.93  |
| Gd                   | 2.4   | 2.52  | 3.12   | 3.14  | 3.23  | 3.17   | 3.21   | 4.23  | 4.31 | 4.19  | 4.25  | 4.45  | 4.91   | 4.44  | 5.13 | 3.9   | 3.89  |
| Tb                   | 0.34  | 0.38  | 0.45   | 0.47  | 0.47  | 0.45   | 0.47   | 0.64  | 0.67 | 0.66  | 0.65  | 0.67  | 0.73   | 0.69  | 0.79 | 0.64  | 0.63  |
| Dy                   | 1.96  | 2.24  | 2.92   | 2.88  | 2.96  | 2.75   | 2.96   | 4.18  | 4.38 | 4.16  | 4.23  | 4.16  | 4.76   | 4.51  | 5    | 4.3   | 4.18  |
| Ho                   | 0.41  | 0.45  | 0.6    | 0.59  | 0.61  | 0.6    | 0.62   | 0.89  | 0.93 | 0.91  | 0.88  | 0.9   | 1.02   | 0.92  | 1.06 | 0.93  | 0.88  |
| Er                   | 1.29  | 1.33  | 1.89   | 1.8   | 1.82  | 1.85   | 1.98   | 2.65  | 2.69 | 2.6   | 2.55  | 2.68  | 2.9    | 2.78  | 3.13 | 2.69  | 2.67  |
| Tm                   | 0.17  | 0.2   | 0.26   | 0.26  | 0.27  | 0.26   | 0.26   | 0.36  | 0.38 | 0.35  | 0.36  | 0.38  | 0.41   | 0.37  | 0.44 | 0.4   | 0.37  |
| Yb                   | 1.31  | 1.41  | 1.84   | 1.82  | 1.83  | 1.72   | 1.95   | 2.48  | 2.54 | 2.5   | 2.51  | 2.44  | 2.67   | 2.44  | 3.17 | 2.6   | 2.35  |
| Lu                   | 0.21  | 0.22  | 0.28   | 0.27  | 0.3   | 0.29   | 0.3    | 0.36  | 0.4  | 0.36  | 0.35  | 0.36  | 0.4    | 0.4   | 0.46 | 0.37  | 0.35  |
| REE                  | 68.64 | 72.61 | 105.31 | 92.46 | 110.7 | 102.68 | 101.77 | 80.07 | 79.7 | 76.96 | 75.58 | 77.82 | 101.84 | 91.71 | 92.2 | 58.55 | 56.83 |
| (La/Yb) <sub>N</sub> | 7.94  | 7.94  | 9.20   | 7.45  | 10.19 | 9.59   | 8.31   | 3.76  | 3.59 | 3.56  | 3.40  | 3.67  | 4.76   | 4.64  | 3.33 | 2.16  | 2.32  |
