# Supplementary material
Source: publisher figshare collection journal article supplement (https://geolsoc.figshare.com/articles/dataset/_/3453044)
Supplement: Supplementary file 3 [file 1]

Appendix 3. Zircon Lu-Hf isotope data of the andesite, gabbroic diorite, and potassic-altered diorite from the Gangcha complex in the Xiekeng Cu-Au deposit.

| Spots                    | Age (Ma) | $^{176}\text{Yb}/^{177}\text{Hf}$ | $2\sigma$ | $^{176}\text{Lu}/^{177}\text{Hf}$ | $2\sigma$ | $^{176}\text{Hf}/^{177}\text{Hf}$ | $2\sigma$ | $^{176}\text{Hf}/^{177}\text{Hf}_i$ | $\epsilon_{\text{Hf}}(t)$ | $T_{\text{DM1}}(\text{Ma})$ | $T_{\text{DM2}}(\text{Ma})$ |
|--------------------------|----------|-----------------------------------|-----------|-----------------------------------|-----------|-----------------------------------|-----------|-------------------------------------|---------------------------|-----------------------------|-----------------------------|
| 09XK30: andesite         |          |                                   |           |                                   |           |                                   |           |                                     |                           |                             |                             |
| 1                        | 242      | 0.056060                          | 0.000463  | 0.001228                          | 0.000029  | 0.282790                          | 0.000020  | 0.282784                            | 5.7                       | 659                         | 906                         |
| 2                        | 310      | 0.032896                          | 0.000383  | 0.000878                          | 0.000026  | 0.282667                          | 0.000021  | 0.282662                            | 2.9                       | 826                         | 1139                        |
| 4                        | 240      | 0.098717                          | 0.002422  | 0.002358                          | 0.000029  | 0.282611                          | 0.000024  | 0.282601                            | -0.8                      | 941                         | 1320                        |
| 5                        | 235      | 0.057698                          | 0.002207  | 0.001155                          | 0.000029  | 0.282650                          | 0.000021  | 0.282645                            | 0.7                       | 856                         | 1225                        |
| 6                        | 243      | 0.054423                          | 0.000386  | 0.001159                          | 0.000009  | 0.282709                          | 0.000022  | 0.282704                            | 2.9                       | 772                         | 1087                        |
| 10                       | 451      | 0.029872                          | 0.000277  | 0.000697                          | 0.000003  | 0.282699                          | 0.000019  | 0.282693                            | 7.1                       | 777                         | 980                         |
| 11                       | 246      | 0.038054                          | 0.000760  | 0.000770                          | 0.000019  | 0.282736                          | 0.000020  | 0.282733                            | 4.0                       | 726                         | 1019                        |
| 12                       | 243      | 0.043181                          | 0.000786  | 0.000956                          | 0.000027  | 0.282686                          | 0.000021  | 0.282682                            | 2.2                       | 800                         | 1136                        |
| 13                       | 242      | 0.069780                          | 0.001164  | 0.001951                          | 0.000057  | 0.282695                          | 0.000023  | 0.282686                            | 2.3                       | 810                         | 1127                        |
| 22                       | 240      | 0.088362                          | 0.001895  | 0.002533                          | 0.000104  | 0.282656                          | 0.000021  | 0.282645                            | 0.8                       | 880                         | 1222                        |
| 24                       | 450      | 0.019827                          | 0.000418  | 0.000483                          | 0.000008  | 0.282786                          | 0.000018  | 0.282782                            | 10.3                      | 651                         | 779                         |
| 25                       | 777      | 0.085014                          | 0.000844  | 0.001821                          | 0.000021  | 0.281822                          | 0.000024  | 0.281796                            | -17.4                     | 2051                        | 2783                        |
| 28                       | 236      | 0.031222                          | 0.000382  | 0.000709                          | 0.000006  | 0.282701                          | 0.000017  | 0.282698                            | 2.6                       | 774                         | 1104                        |
| 30                       | 243      | 0.050550                          | 0.000595  | 0.001080                          | 0.000021  | 0.282688                          | 0.000020  | 0.282683                            | 2.2                       | 801                         | 1134                        |
| 31                       | 451      | 0.056096                          | 0.000643  | 0.001537                          | 0.000034  | 0.282832                          | 0.000024  | 0.282819                            | 11.6                      | 605                         | 695                         |
| 09XK47: gabbroic diorite |          |                                   |           |                                   |           |                                   |           |                                     |                           |                             |                             |
| 1                        | 248      | 0.097914                          | 0.001116  | 0.002104                          | 0.000071  | 0.282646                          | 0.000020  | 0.282636                            | 0.6                       | 885                         | 1237                        |
| 4                        | 246      | 0.214512                          | 0.001612  | 0.003865                          | 0.000033  | 0.282771                          | 0.000024  | 0.282754                            | 4.8                       | 737                         | 973                         |
| 5                        | 244      | 0.098008                          | 0.004589  | 0.001895                          | 0.000089  | 0.282623                          | 0.000022  | 0.282615                            | -0.2                      | 912                         | 1287                        |
| 6                        | 245      | 0.131948                          | 0.000994  | 0.002422                          | 0.000028  | 0.282668                          | 0.000024  | 0.282657                            | 1.3                       | 859                         | 1190                        |
| 9                        | 244      | 0.061597                          | 0.000412  | 0.001157                          | 0.000013  | 0.282590                          | 0.000021  | 0.282585                            | -1.3                      | 940                         | 1353                        |
| 10                       | 243      | 0.117771                          | 0.000574  | 0.002125                          | 0.000003  | 0.282589                          | 0.000022  | 0.282580                            | -1.5                      | 967                         | 1366                        |
| 12                       | 243      | 0.069539                          | 0.000588  | 0.001241                          | 0.000007  | 0.282550                          | 0.000023  | 0.282544                            | -2.7                      | 1000                        | 1446                        |
| 14                       | 244      | 0.039511                          | 0.001062  | 0.000779                          | 0.000026  | 0.282615                          | 0.000024  | 0.282611                            | -0.3                      | 897                         | 1294                        |

|                                   |     |          |          |          |          |          |          |          |      |      |      |
|-----------------------------------|-----|----------|----------|----------|----------|----------|----------|----------|------|------|------|
| 16                                | 246 | 0.094786 | 0.000771 | 0.001803 | 0.000008 | 0.282625 | 0.000021 | 0.282617 | -0.1 | 906  | 1280 |
| 18                                | 240 | 0.085053 | 0.000334 | 0.001732 | 0.000022 | 0.282610 | 0.000021 | 0.282602 | -0.7 | 927  | 1317 |
| 19                                | 242 | 0.081325 | 0.000536 | 0.001630 | 0.000005 | 0.282666 | 0.000023 | 0.282658 | 1.3  | 845  | 1190 |
| 23                                | 242 | 0.061979 | 0.000767 | 0.001290 | 0.000014 | 0.282529 | 0.000022 | 0.282524 | -3.5 | 1030 | 1492 |
| 26                                | 244 | 0.105378 | 0.000373 | 0.002064 | 0.000002 | 0.282635 | 0.000022 | 0.282626 | 0.2  | 898  | 1261 |
| 27                                | 246 | 0.199759 | 0.006330 | 0.003855 | 0.000108 | 0.282659 | 0.000024 | 0.282641 | 0.8  | 909  | 1226 |
| 29                                | 245 | 0.057275 | 0.000252 | 0.001201 | 0.000004 | 0.282597 | 0.000020 | 0.282592 | -1.0 | 931  | 1337 |
| 10XKTK3: potassic-altered diorite |     |          |          |          |          |          |          |          |      |      |      |
| 1                                 | 232 | 0.047823 | 0.000220 | 0.000960 | 0.000002 | 0.282723 | 0.000019 | 0.282719 | 3.2  | 748  | 1059 |
| 3                                 | 233 | 0.225153 | 0.002165 | 0.004996 | 0.000039 | 0.282661 | 0.000028 | 0.282639 | 0.4  | 936  | 1238 |
| 4                                 | 234 | 0.062555 | 0.001591 | 0.001586 | 0.000073 | 0.282724 | 0.000022 | 0.282717 | 3.2  | 760  | 1063 |
| 5                                 | 235 | 0.075301 | 0.003737 | 0.002083 | 0.000145 | 0.282687 | 0.000022 | 0.282677 | 1.8  | 825  | 1151 |
| 7                                 | 420 | 0.040994 | 0.002199 | 0.000975 | 0.000044 | 0.282725 | 0.000019 | 0.282717 | 7.3  | 746  | 944  |
| 8                                 | 234 | 0.077712 | 0.002250 | 0.002255 | 0.000084 | 0.282680 | 0.000028 | 0.282670 | 1.5  | 839  | 1169 |
| 10                                | 419 | 0.037417 | 0.000326 | 0.000851 | 0.000004 | 0.282414 | 0.000018 | 0.282408 | -3.7 | 1179 | 1643 |
| 11                                | 235 | 0.031397 | 0.001210 | 0.000742 | 0.000036 | 0.282711 | 0.000018 | 0.282708 | 2.9  | 761  | 1083 |
| 12                                | 235 | 0.043535 | 0.000413 | 0.001030 | 0.000021 | 0.282712 | 0.000021 | 0.282708 | 2.9  | 765  | 1083 |
| 14                                | 234 | 0.061375 | 0.001372 | 0.001264 | 0.000023 | 0.282693 | 0.000021 | 0.282687 | 2.1  | 798  | 1130 |
| 15                                | 234 | 0.085283 | 0.002320 | 0.001784 | 0.000042 | 0.282765 | 0.000019 | 0.282758 | 4.6  | 704  | 971  |
| 16                                | 235 | 0.118150 | 0.005495 | 0.002898 | 0.000138 | 0.282619 | 0.000023 | 0.282607 | -0.7 | 943  | 1310 |
| 19                                | 232 | 0.037918 | 0.000139 | 0.000837 | 0.000006 | 0.282672 | 0.000020 | 0.282668 | 1.4  | 818  | 1173 |
| 20                                | 234 | 0.053591 | 0.000727 | 0.001370 | 0.000036 | 0.282775 | 0.000020 | 0.282769 | 5.0  | 683  | 946  |
| 21                                | 236 | 0.036945 | 0.000284 | 0.000806 | 0.000004 | 0.282765 | 0.000019 | 0.282761 | 4.8  | 687  | 962  |

Decay constant for  $^{176}\text{Lu}$  is  $1.867 \times 10^{-11} \text{ yr}^{-1}$  (Soderlund et al., 2004), the chondritic ratios of  $^{176}\text{Hf}/^{177}\text{Hf}$  and  $^{176}\text{Lu}/^{177}\text{Hf}$  are 0.282772 and 0.0332 (Blichert-Toft, et al., 1997), and depleted mantle ratios of  $(^{176}\text{Lu}/^{177}\text{Hf})_{\text{DM}}$  and  $(^{176}\text{Hf}/^{177}\text{Hf})_{\text{DM}}$  are 0.0384 and 0.28235 (Griffin *et al.*, 2000).

$$T_{\text{DM1}} = 1/\lambda \times \ln \left\{ 1 + \frac{(^{176}\text{Hf}/^{177}\text{Hf})_{\text{sample}} - (^{176}\text{Hf}/^{177}\text{Hf})_{\text{DM}}}{(^{176}\text{Lu}/^{177}\text{Hf})_{\text{sample}} - (^{176}\text{Lu}/^{177}\text{Hf})_{\text{DM}}} \right\}; \quad T_{\text{DM2}} = \frac{T_{\text{DM1}} - (T_{\text{DM1}} - t) \left[ \frac{f_{\text{C}} - f_{\text{sample}}}{f_{\text{C}} - f_{\text{DM}}} \right]}{f_{\text{Lu/Hf}} = \frac{(^{176}\text{Hf}/^{177}\text{Hf})_{\text{sample}}}{(^{176}\text{Hf}/^{177}\text{Hf})_{\text{CHUR}}} - 1}$$
